# Supplementary material for: Affectional interactions with your animated child avatar can enhance wellbeing
Source: Frontiers journal article supplement (doi:10.3389/frvir.2024.1424217), 2024-08-26
Supplement: Table_1.XLSX [file Table_1.XLSX]

## Sheet: Info
	"Raw Data" Columns A-C	Meaning
	Index	Participant index
	avatar_used	Whether participants used their avatars (1 = yes, 0 = no).
	diary_completion_%	Diary Completion Percentage
	Time Name	Meaning
	Pre	Pre-test scores
	Post	Post-test scores
	Follow	Follow-up scores
	Questionnaire Name	Meaning
	CPC-12R	Compound Psychological Capital Scale Revision
	PERMA	PERMA - Overall Well-Being (23 items)
	PERMA_P	PERMA - Positive Emotion
	PERMA_E	PERMA - Engagement
	PERMA_R	PERMA - Relationships
	PERMA_M	PERMA - Meaning
	PERMA_A	PERMA - Accomplishment
	PERMA_N	PERMA - Negative Emotion
	PERMA_H	PERMA - Health
	PERMA_Lon	PERMA - Loneliness
	SOCS-S	Sussex-Oxford Compassion for the Self Scale (20 items)
	SOCS-S_A	Subscale A: Recognising suffering (4 items)
	SOCS-S_B	Subscale B: Understanding the universality of suffering (4 items)
	SOCS-S_C	Subscale C: Feeling for the person suffering (4 items)
	SOCS-S_D	Subscale D: Tolerating uncomfortable feelings (4 items)
	SOCS-S_E	Subscale E: Acting or being motivated to act to alleviate suffering (4 items)

## Sheet: Raw Data
Index	avatar_used	diary_completion_%	GAD-7	PHQ-9	WEMWBS	pre_CPC-12R	post_CPC-12R	follow_CPC-12R	pre_PERMA_P	pre_PERMA_E	pre_PERMA_R	pre_PERMA_M	pre_PERMA_A	pre_PERMA	pre_PERMA_N	pre_PERMA_H	pre_PERMA_Lon	post_PERMA_P	post_PERMA_E	post_PERMA_R	post_PERMA_M	post_PERMA_A	post_PERMA	post_PERMA_N	post_PERMA_H	post_PERMA_Lon	follow_PERMA_P	follow_PERMA_E	follow_PERMA_R	follow_PERMA_M	follow_PERMA_A	follow_PERMA	follow_PERMA_N	follow_PERMA_H	follow_PERMA_Lon	pre_SOCS-S	post_SOCS-S	follow_SOCS-S	pre_SOCS-S_A	pre_SOCS-S_B	pre_SOCS-S_C	pre_SOCS-S_D	pre_SOCS-S_E	post_SOCS-S_A	post_SOCS-S_B	post_SOCS-S_C	post_SOCS-S_D	post_SOCS-S_E	follow_SOCS-S_A
1	1	100	2	0	59	71	72	69	9	8.66667	9	8.33333	8.33333	8.625	1.66667	8.33333	1	8.66667	8.66667	9	8	8.33333	8.5625	3.66667	8.33333	0	8.66667	9	9	8.33333	8.33333	8.6875	2	8	1	75	88	79	16	17	13	15	14	17	20	17	16	18	16
2	0	81.25	0	0	57	64	70	70	7.66667	7.33333	8.33333	7.66667	7.66667	7.75	2	9.33333	1	8.66667	8.33333	9.33333	10	9	9.125	0.333333	10	0	8	8	8.66667	8.66667	8.33333	8.375	2	9.33333	0	79	96	85	15	20	14	16	14	19	20	19	19	19	17
3	1	100	0	2	57	38	60	53	4.33333	5	6.66667	4.66667	4.66667	5	6	4.66667	4	9	10	10	10	9.33333	9.625	2.33333	8	10	7.66667	9	9.33333	8.66667	8.33333	8.5625	3.33333	7.66667	2	78	100	99	18	19	14	13	14	20	20	20	20	20	20
4	1	62.5	2	1	50	60	59	58	7.66667	5.33333	5.66667	9	9.33333	7.4375	6.33333	8.33333	10	8	6.66667	7.33333	8.33333	9	7.875	3.33333	7.66667	4	8	6.66667	7.33333	9.66667	8	8	3.33333	9	3	80	96	98	19	18	15	13	15	20	20	18	19	19	20
5	1	100	3	1	61	53	66	67	7	9.66667	7	7.33333	6.66667	7.4375	5	7.66667	6	7.66667	10	9.33333	8.66667	8.66667	8.8125	4.66667	8	3	8.66667	9.33333	9.33333	9	9	9.0625	4.33333	8	3	68	96	92	19	18	8	7	16	20	20	17	19	20	20
6	0	100	2	3	64	70	72	70	4.33333	4.33333	6.66667	7.33333	8	6.125	4	8.66667	3	7.33333	5.66667	9	9.33333	9.33333	8.1875	1.66667	9	1	7.33333	7.33333	7.33333	8.66667	8.33333	7.8125	6	8.66667	1	83	89	89	17	19	13	17	17	18	20	17	17	17	17
7	0	0	2	4	54	59	61	62	7	8	8.33333	8	7.33333	7.6875	3.66667	7.33333	3	7.66667	8	9	8.33333	6.66667	7.9375	3	6.66667	7	8	6.66667	8	9.33333	7.66667	7.875	3.66667	7.33333	2	82	86	87	15	19	16	16	16	15	17	18	18	18	17
8	0	93.75	9	4	48	51	57	52	4.66667	5	5.66667	7.33333	6.66667	5.8125	6.66667	7.66667	7	6.33333	6.66667	6	7	6.66667	6.5625	6.33333	7.66667	5	5.66667	5.66667	5.66667	7	7.33333	6.25	6.66667	7.66667	5	72	71	70	16	20	11	10	15	16	20	11	10	14	15
9	1	25	3	2	58	59	67	59	8	7.66667	8.33333	7.66667	7.66667	7.875	3.33333	7	3	7.33333	7.33333	9.33333	8	7.66667	7.9375	2	7.66667	2	7	6.66667	7.66667	7.66667	7	7.1875	3	7	2	86	83	80	17	20	16	17	16	16	20	16	16	15	16
10	0	68.75	13	11	39	58	55	56	4	6	5	8.33333	8.33333	6.125	8.33333	6	9	4.66667	8	7.66667	8.33333	8.33333	7.1875	8.33333	7	9	7	9.33333	4.33333	8.66667	8.66667	7.5	6.33333	7.66667	7	53	51	62	12	15	10	6	10	11	14	10	7	9	14
11	1	100	14	14	38	60	52	60	4.66667	7.33333	3.66667	8	6.33333	5.8125	6.66667	3	1	4.33333	5.66667	5	7.33333	6.66667	5.6875	4.66667	4	0	6.33333	6.66667	7.33333	7.33333	6.33333	6.875	4.33333	7	6	71	61	75	12	18	12	8	9	13	14	11	12	11	18
12	1	100	4	4	51	64	64	65	5.66667	7	5.66667	7.33333	7.33333	6.625	4.33333	8.33333	4	8.66667	9	9	9.33333	9	8.9375	2.66667	9.66667	0	8	8	8.66667	8	8	8.125	3	8.66667	2	68	98	82	13	16	12	13	14	19	20	19	20	20	16
13	1	87.5	3	2	47	44	60	58	5	4.66667	6.33333	5.33333	5	5.25	4.66667	6.33333	5	8	7.66667	8.66667	8	7.33333	7.9375	4	8.33333	3	7.33333	7.66667	8	7.66667	7.66667	7.625	3	8	7	70	77	78	13	19	13	12	13	16	17	15	13	16	15
14	0	12.5	10	7	48	44	51	49	4.66667	4	7.66667	3	5.33333	4.8125	4	5	3	4.66667	4.33333	6	3.66667	5	4.8125	4	4.66667	5	4.66667	4.66667	7.66667	4.66667	5.33333	5.4375	4.33333	6.33333	6	71	68	54	20	16	12	10	13	16	15	13	10	14	14
15	1	75	9	14	37	33	52	54	4	7	8	5	7.33333	6.125	6.66667	4.33333	7	7	8.66667	9.33333	5.66667	6.66667	7.5625	6	4	8	7.66667	9.33333	9.33333	7	6.33333	7.9375	2.66667	4.66667	1	56	62	74	16	20	7	6	7	13	20	9	12	8	19
16	0	100	1	4	55	47	50	56	7	6.66667	9	6.33333	7	7.1875	6.66667	5	2	8	8.33333	9.33333	8	7.66667	8.25	3.66667	5	9	8.33333	7.33333	9.66667	7.66667	8	8.25	5.33333	6.33333	1	70	86	85	14	19	12	12	13	18	20	16	16	16	17
17	1	100	4	7	46	56	67	64	7	6	6.33333	7.33333	7	6.6875	4.66667	8	4	7.66667	9	6.66667	9.33333	8.66667	8.1875	3	8.33333	3	8	7.66667	7	8.33333	9	8	3.66667	8.66667	3	82	94	97	18	20	16	14	14	20	20	18	20	16	20
18	1	100	2	1	57	67	72	70	9	7.66667	7.33333	8.66667	9.33333	8.4375	4.66667	9	0	9.33333	6.66667	7	9.33333	9.33333	8.4375	4	9	0	9	9	6	9.33333	9	8.5	4.66667	9.33333	1	86	90	84	16	19	16	17	18	20	19	16	17	18	19
19	0	100	8	3	57	64	63	63	7.66667	8	9.33333	8.33333	7	8.0625	5.33333	6	2	8	7.66667	8.33333	8.33333	7.33333	7.9375	4.33333	7	2	6.66667	8	8.33333	5	7.33333	7.0625	4	6.33333	2	64	89	82	15	16	14	8	11	17	19	18	18	17	17
20	0	100	4	6	41	54	55	58	3	8.33333	3.33333	3	5	4.4375	7	9.33333	2	2.66667	9	3.33333	4.33333	5.66667	4.8125	6	10	9	4.33333	9.33333	1.33333	8.33333	8.66667	6.25	6.33333	9.66667	10	82	29	85	17	18	16	16	15	4	4	8	6	7	18
21	0	75	7	4	49	53	59	53	6.33333	7	8	6.66667	6.33333	6.875	5.33333	8	7	7.33333	7.33333	7.66667	6.66667	7	7.25	3	8.66667	8	6	5	8.33333	5	4.66667	5.8125	5.33333	8.66667	8	79	78	80	18	19	14	15	13	14	20	15	14	15	15
22	0	37.5	6	3	46	54	53	49	7	7.33333	7.33333	7	7.66667	7.25	5.33333	8.66667	4	7	6.66667	6.66667	7.33333	7	6.9375	5.33333	8	6	6	6	6.66667	7	7.66667	6.625	6.33333	8.66667	4	44	73	73	8	19	5	6	6	15	19	13	12	14	16
[truncated: 4 more columns]

## Sheet: Whole group (N=22)
Name	Comparison	t-value	ES (d)	Z-value	ES (r)	p-value
CPC-12R	Pre/Post	3.297	0.594			0.003
CPC-12R	Pre/Follow-up			2.529	0.678	0.012
PERMA	Pre/Post			3.38	0.862	0.001
PERMA_P	Pre/Post			3.107	0.79	0.002
PERMA_E	Pre/Post	2.995	0.65			0.007
PERMA_R	Pre/Post	3.124	0.543			0.005
PERMA_M	Pre/Post			2.981	0.779	0.003
PERMA_A	Pre/Post			2.466	0.68	0.015
PERMA_N	Pre/Post	-4.375	-0.68			0
PERMA_H	Pre/Post			2.36	0.632	0.019
PERMA_Lon	Pre/Post	0.381	0.087			0.707
PERMA	Pre/Follow-up	3.424	0.754			0.003
PERMA_P	Pre/Follow-up	3.504	0.702			0.002
PERMA_E	Pre/Follow-up	2.424	0.555			0.024
PERMA_R	Pre/Follow-up	1.792	0.311			0.087
PERMA_M	Pre/Follow-up	2.331	0.558			0.03
PERMA_A	Pre/Follow-up	2.017	0.501			0.057
PERMA_N	Pre/Follow-up	-2.846	-0.539			0.01
PERMA_H	Pre/Follow-up			3.212	0.912	0.001
PERMA_Lon	Pre/Follow-up	-0.729	-0.181			0.474
SOCS-S	Pre/Post			2.549	0.621	0.009
SOCS-S_A	Pre/Post			1.335	0.338	0.188
SOCS-S_B	Pre/Post			0.43	0.125	0.688
SOCS-S_C	Pre/Post	3.249	0.752			0.004
SOCS-S_D	Pre/Post	2.948	0.701			0.008
SOCS-S_E	Pre/Post	3.007	0.622			0.007
SOCS-S	Pre/Follow-up	3.782	0.778			0.001
SOCS-S_A	Pre/Follow-up	2.416	0.599			0.025
SOCS-S_B	Pre/Follow-up	0.535	0.102			0.598
SOCS-S_C	Pre/Follow-up	4.628	0.903			0
SOCS-S_D	Pre/Follow-up	3.309	0.739			0.003
SOCS-S_E	Pre/Follow-up	3.652	0.727			0.001

## Sheet: Compliant subgroup (N=18)
Name	Comparison	t-value	ES (d)	Z-value	ES (r)	p-value
CPC-12R	Pre/Post	2.897	0.598			0.01
CPC-12R	Pre/Follow-up			2.447	0.717	0.016
PERMA	Pre/Post			3.339	0.922	0.001
PERMA_P	Pre/Post			3.163	0.848	0.001
PERMA_E	Pre/Post	3.317	0.857			0.004
PERMA_R	Pre/Post	3.723	0.653			0.002
PERMA_M	Pre/Post			2.815	0.825	0.005
PERMA_A	Pre/Post			2.891	0.876	0.004
PERMA_N	Pre/Post	-4.243	-0.731			0.001
PERMA_H	Pre/Post			2.706	0.819	0.007
PERMA_Lon	Pre/Post			-0.659	-0.192	0.529
PERMA	Pre/Follow-up	3.933	0.978			0.001
PERMA_P	Pre/Follow-up	4.225	0.886			0.001
PERMA_E	Pre/Follow-up	3.294	0.831			0.004
PERMA_R	Pre/Follow-up	2.145	0.396			0.047
PERMA_M	Pre/Follow-up	1.995	0.617			0.062
PERMA_A	Pre/Follow-up	2.128	0.616			0.048
PERMA_N	Pre/Follow-up	-3.269	-0.669			0.005
PERMA_H	Pre/Follow-up			3.074	0.9	0.002
PERMA_Lon	Pre/Follow-up	-0.816	-0.221			0.426
SOCS-S	Pre/Post			2.331	0.626	0.018
SOCS-S_A	Pre/Post			1.526	0.418	0.133
SOCS-S_B	Pre/Post			0.775	0.242	0.459
SOCS-S_C	Pre/Post	2.793	0.758			0.012
SOCS-S_D	Pre/Post	2.721	0.757			0.015
SOCS-S_E	Pre/Post			2.489	0.706	0.014
SOCS-S	Pre/Follow-up	5.27	1.035			0
SOCS-S_A	Pre/Follow-up	3.571	0.743			0.002
SOCS-S_B	Pre/Follow-up	1.046	0.235			0.31
SOCS-S_C	Pre/Follow-up	4.873	1.083			0
SOCS-S_D	Pre/Follow-up	3.663	0.925			0.002
SOCS-S_E	Pre/Follow-up	5.3	0.924			0

## Sheet: Avatar subgroup (N=11)
Name	Comparison	t-value	ES (d)	Z-value	ES (r)	p-value
CPC-12R	Pre/Post	2.774	0.794			0.02
CPC-12R	Pre/Follow-up	2.655	0.706			0.024
PERMA	Pre/Post	2.902	1.117			0.016
PERMA_P	Pre/Post	2.42	0.785			0.036
PERMA_E	Pre/Post	2.025	0.784			0.07
PERMA_R	Pre/Post	4.048	0.971			0.002
PERMA_M	Pre/Post	2.277	0.867			0.046
PERMA_A	Pre/Post	2.222	0.811			0.051
PERMA_N	Pre/Post	-2.763	-0.89			0.02
PERMA_H	Pre/Post	2.092	0.365			0.063
PERMA_Lon	Pre/Post	-1.187	-0.335			0.263
PERMA	Pre/Follow-up	3.353	1.234			0.007
PERMA_P	Pre/Follow-up	2.997	1.001			0.013
PERMA_E	Pre/Follow-up	2.526	0.859			0.03
PERMA_R	Pre/Follow-up	2.887	1.009			0.016
PERMA_M	Pre/Follow-up	2.838	0.924			0.018
PERMA_A	Pre/Follow-up	1.443	0.559			0.18
PERMA_N	Pre/Follow-up	-3.692	-1.26			0.004
PERMA_H	Pre/Follow-up			2.403	0.854	0.019
PERMA_Lon	Pre/Follow-up	-1.238	-0.499			0.244
SOCS-S	Pre/Post	3.05	0.954			0.012
SOCS-S_A	Pre/Post	2.152	0.564			0.057
SOCS-S_B	Pre/Post	0.803	0.326			0.441
SOCS-S_C	Pre/Post	3.26	0.93			0.009
SOCS-S_D	Pre/Post	3.805	1.23			0.003
SOCS-S_E	Pre/Post	4.113	0.769			0.002
SOCS-S	Pre/Follow-up	3.638	1.113			0.005
SOCS-S_A	Pre/Follow-up	3.597	0.867			0.005
SOCS-S_B	Pre/Follow-up	0.521	0.174			0.614
SOCS-S_C	Pre/Follow-up	3.749	1.052			0.004
SOCS-S_D	Pre/Follow-up	2.707	1.137			0.022
SOCS-S_E	Pre/Follow-up	3.34	0.782			0.007

## Sheet: Photo subgroup (N=11)
Name	Comparison	t-value	ES (d)	Z-value	ES (r)	p-value
CPC-12R	Pre/Post	2.492	0.326			0.032
CPC-12R	Pre/Follow-up	1.5	0.229			0.165
PERMA	Pre/Post	2.896	0.468			0.016
PERMA_P	Pre/Post	2.939	0.452			0.015
PERMA_E	Pre/Post	2.742	0.487			0.021
PERMA_R	Pre/Post	0.84	0.174			0.421
PERMA_M	Pre/Post	2.731	0.379			0.021
PERMA_A	Pre/Post	1.423	0.247			0.185
PERMA_N	Pre/Post	-3.484	-0.531			0.006
PERMA_H	Pre/Post	1.305	0.137			0.221
PERMA_Lon	Pre/Post	1.695	0.535			0.121
PERMA	Pre/Follow-up	1.523	0.405			0.159
PERMA_P	Pre/Follow-up	1.898	0.506			0.087
PERMA_E	Pre/Follow-up	0.963	0.3			0.358
PERMA_R	Pre/Follow-up	-1	-0.111			0.341
PERMA_M	Pre/Follow-up	0.971	0.34			0.354
PERMA_A	Pre/Follow-up			1.719	0.644	0.097
PERMA_N	Pre/Follow-up	-0.534	-0.107			0.605
PERMA_H	Pre/Follow-up			2.208	1	0.036
PERMA_Lon	Pre/Follow-up			-0.36	-0.133	0.764
SOCS-S	Pre/Post			1.068	0.364	0.32
SOCS-S_A	Pre/Post	-0.225	-0.095			0.826
SOCS-S_B	Pre/Post			-0.287	-0.111	0.829
SOCS-S_C	Pre/Post	1.55	0.544			0.152
SOCS-S_D	Pre/Post	0.911	0.296			0.384
SOCS-S_E	Pre/Post	1.199	0.439			0.258
SOCS-S	Pre/Follow-up	1.869	0.531			0.091
SOCS-S_A	Pre/Follow-up	0.846	0.383			0.417
SOCS-S_B	Pre/Follow-up	0.199	0.043			0.846
SOCS-S_C	Pre/Follow-up	2.742	0.706			0.021
SOCS-S_D	Pre/Follow-up	1.988	0.417			0.075
SOCS-S_E	Pre/Follow-up	1.91	0.631			0.085
